# Supplementary figures and images for: Iron catalyzed tandem ring opening/1,6-conjugate addition of cyclopropanols with p-quinone methides: new access to γ,γ-diaryl ketones
Source: Royal Society of Chemistry journal article supplement (doi:10.1039/d1cc05997a), 2021-01-01

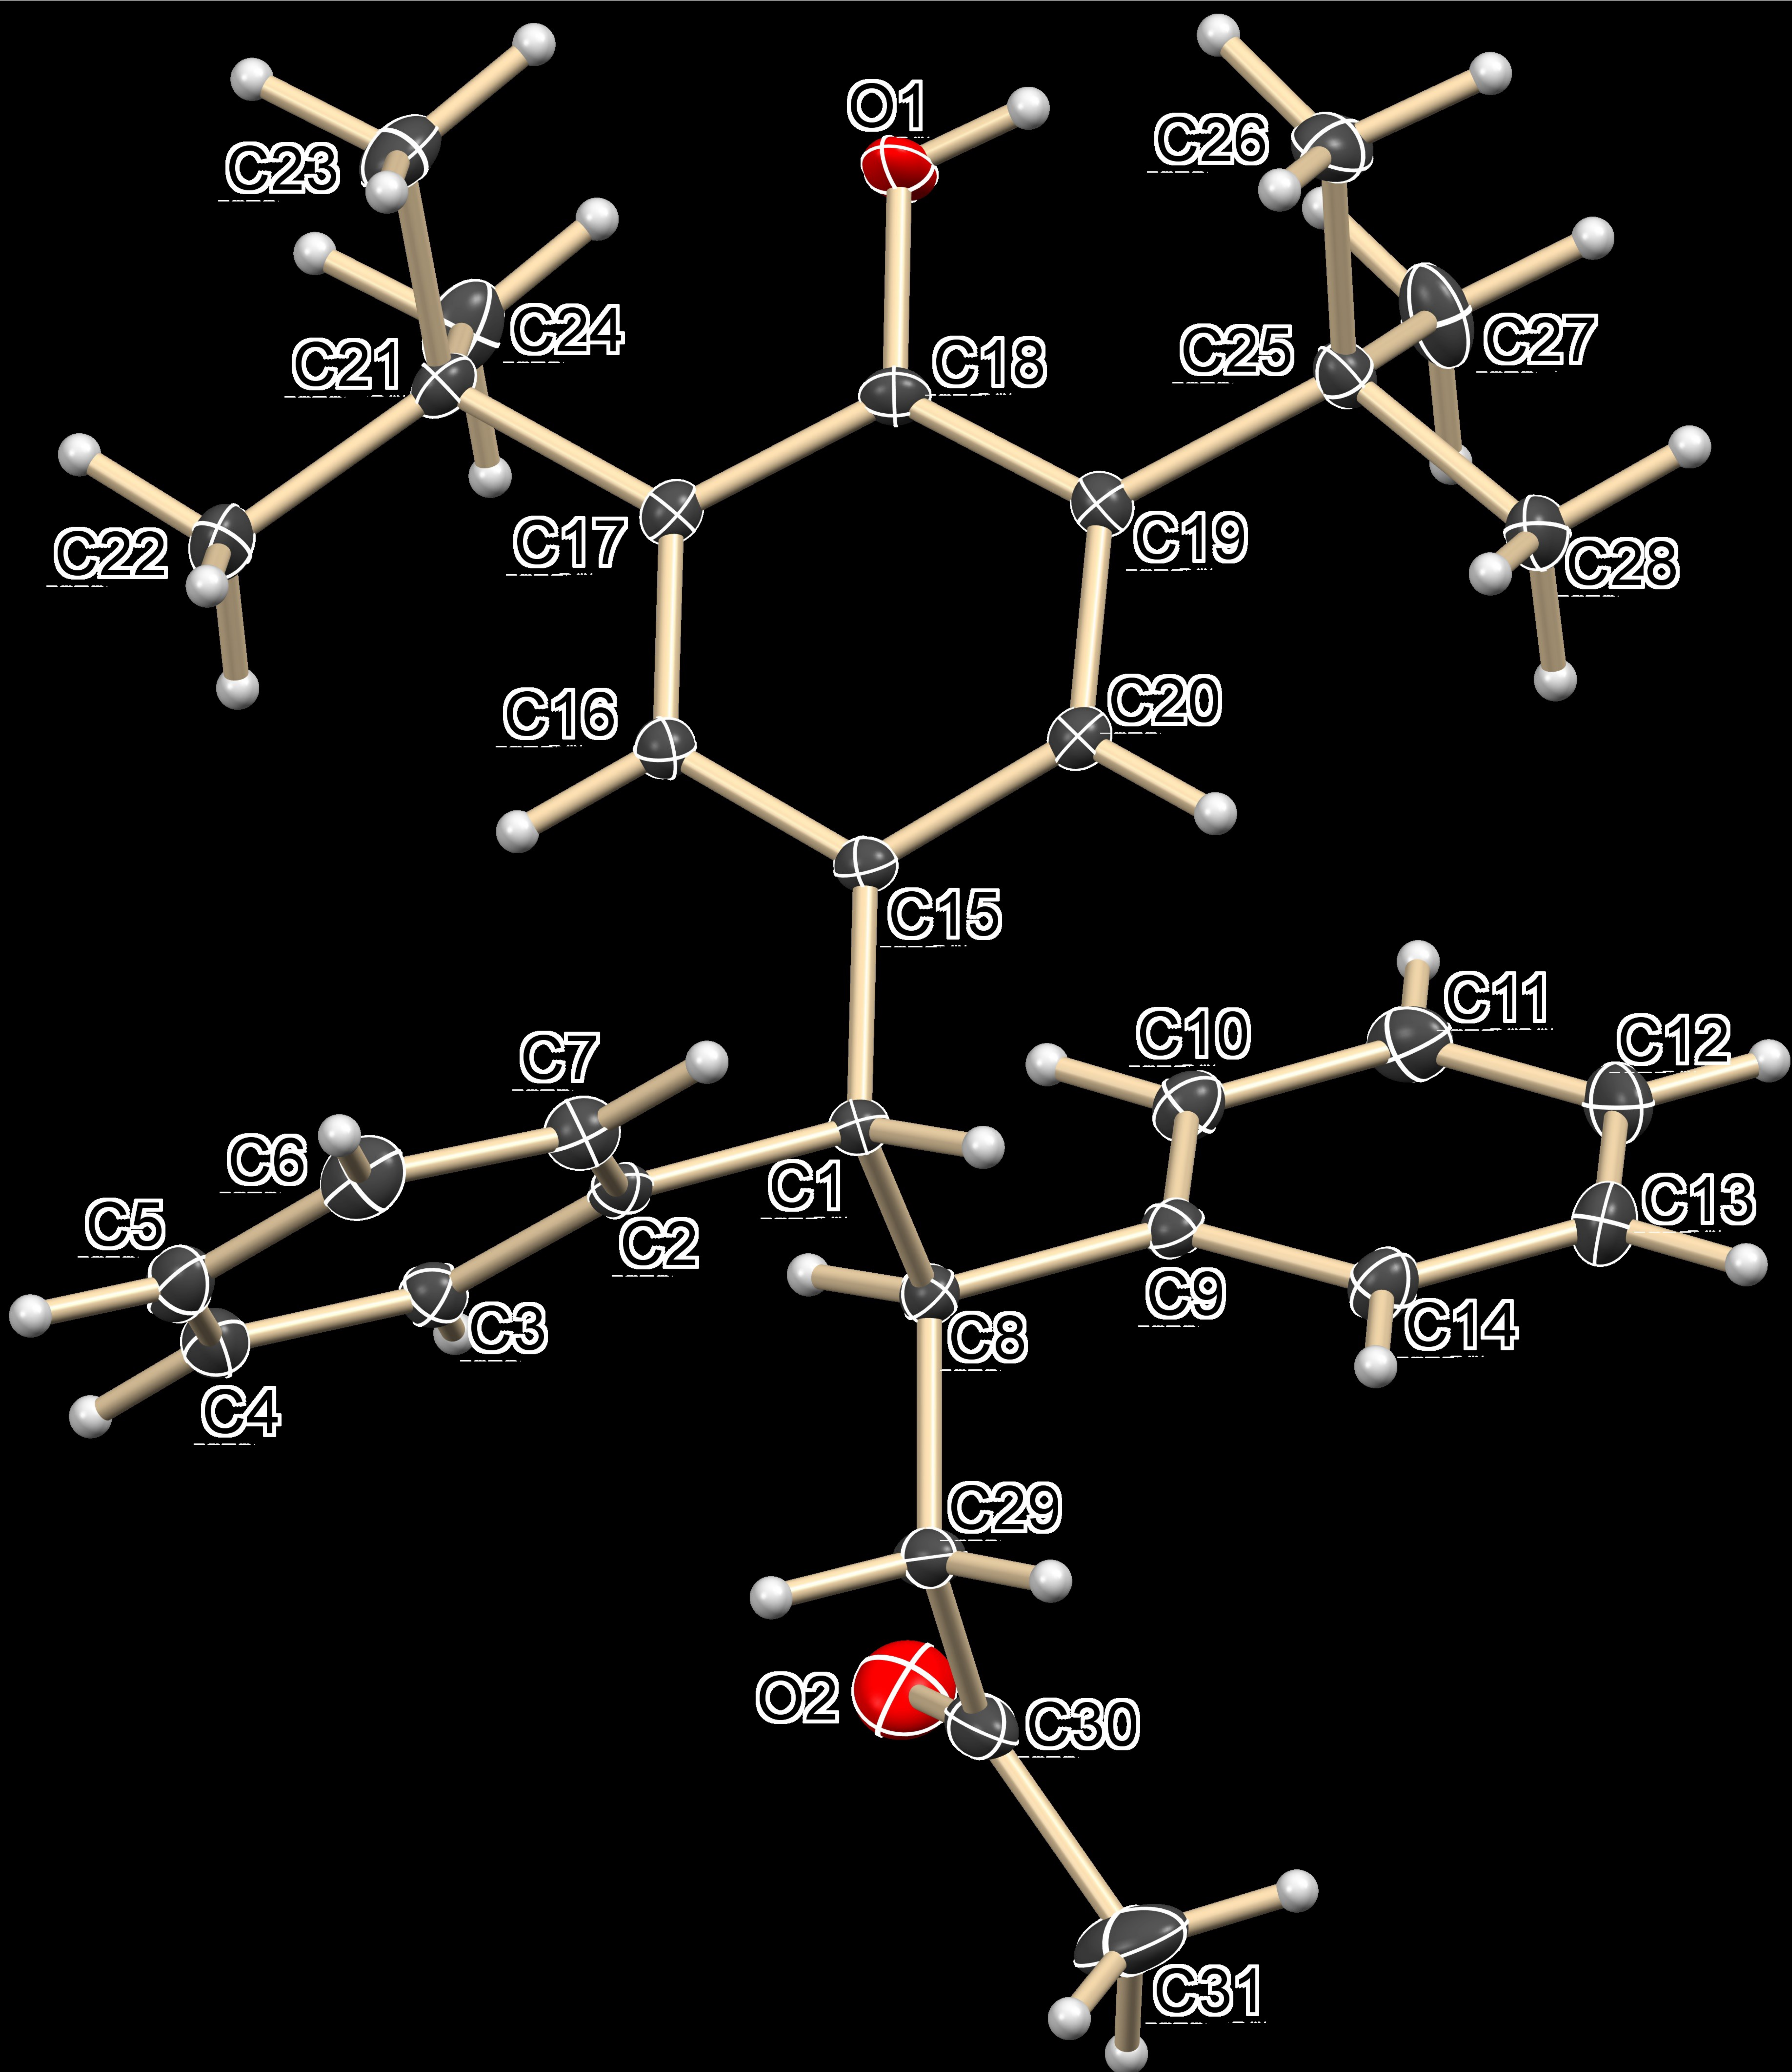

Supplement: d1cc05997a2.pdf [file d1cc05997a2.pdf]
